1 **Title:** Cerebellar disruption impairs working memory during evidence accumulation

2 **Authors:** Ben Deverett<sup>1,2,3</sup>, Mikhail Kislin<sup>1</sup>, David W. Tank<sup>1,2</sup>, Samuel S.-H. Wang\*<sup>1,2</sup>

3 1: Princeton Neuroscience Institute, Princeton University, Princeton, NJ 08544, USA

4 2: Department of Molecular Biology, Princeton University, Princeton, NJ 08544, USA

5 3: Rutgers Robert Wood Johnson Medical School, Piscataway, NJ 08854, USA

6 Corresponding author:

7 Samuel S.-H. Wang

8 Neuroscience Institute, Princeton University

9 Princeton, NJ 08544 USA

10 +1 609 258 0388 (tel)

11 +1 609 258 1028 (fax)

12 sswang@princeton.edu

13 **Abstract**

14 To select actions based on sensory evidence, animals must create and manipulate representations of  
15 stimulus information in memory. We found that during accumulation of somatosensory evidence,  
16 optogenetic manipulation of cerebellar Purkinje cells reduced the accuracy of subsequent memory-guided  
17 decisions and caused mice to downweight prior information. Behavioral deficits were consistent with the  
18 addition of noise and leak to the evidence accumulation process, suggesting the cerebellum can influence  
19 the maintenance of working memory contents.

20 The accumulation of sensory evidence is an important part of decision-making<sup>1</sup>. In rodents  
21 performing evidence accumulation, neuronal perturbation of specific brain regions can have distinct  
22 effects on behavior<sup>2</sup>. Depending on the region, perturbation can cause minimal effects<sup>3</sup>, it can impair  
23 functions related to decision-making<sup>3-6</sup>, or it can influence evidence integration in working memory<sup>7</sup>.  
24 Many forebrain regions implicated in evidence accumulation receive input from the lateral posterior  
25 cerebellum<sup>8-10</sup>, and disruption of the human cerebellum produces working memory impairments<sup>11-14</sup>.  
26 Given its roles in sensorimotor integration<sup>15</sup> and motor preparation<sup>16</sup>, cerebellar output may influence the  
27 evidence accumulation process. Here we examined whether direct, temporally precise disruption of  
28 cerebellar neural activity modulates the accumulation of somatosensory evidence.

29 We used a behavioral task for head-fixed mice in which animals accumulate sensory evidence  
30 over a period of seconds to guide decisions<sup>17</sup>. In each trial (Fig. 1a) the mouse is presented with  
31 simultaneous streams of randomly timed left- and right-sided whisker puffs followed by a delay, after  
32 which it licks in the direction of more puffs to retrieve a water reward. We previously showed that coarse  
33 full-session pharmacological perturbation of the lateral posterior cerebellum alters performance in this  
34 task, and that Purkinje cell (PC) activity there encodes stimulus- and decision-related variables<sup>17</sup>. In the

35 present study we trained 13 mice on this task over hundreds of behavioral sessions (Fig. 1b,  
 36 Supplementary Fig. 1).

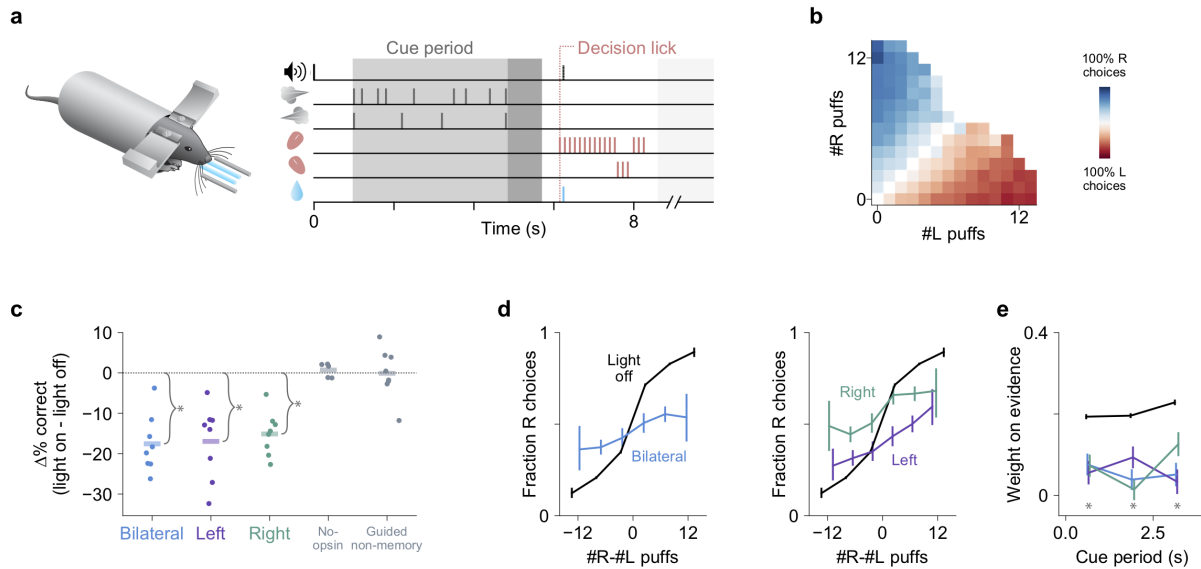

37 **Figure 1: Cerebellar disruption during evidence accumulation impairs decisions.** (a) Schematic of  
 38 the evidence-accumulation decision-making task. In each trial, two streams of random, temporally  
 39 Poisson-distributed air puffs were delivered to the left and right whiskers. After an 800-ms delay, mice  
 40 licked one of two lick ports indicating the side with more cumulative puffs to receive a water reward.  
 41 Gray-shaded regions from left to right: cue period, delay, intertrial interval. Decision lick: first detected  
 42 lick after the delay. (b) Choice probabilities as a function of the number of left- and right-side puffs  
 43 ( $n=96,254$  trials over 664 sessions in 13 mice). (c) Change in performance as a result of cue-period light  
 44 delivery to the left, right, or bilateral cerebellum ( $n=46,435$  light-off trials, 5,392 light-on trials, 397  
 45 sessions, 8 mice). Dots: individual mice. Lines: mean across mice. \*:  $p<0.01$  (two-tailed paired t-test).  
 46 No-opsin: bilateral light delivery in  $ChR2^-$  mice (also see Supplementary Fig. 3). Guided non-memory:  
 47 bilateral light delivery in trials where mice were guided to lick the correct side by delivery of  
 48 all-single-sided puffs during the cue period and delay. (d) Psychometric curves for light-off (black) trials  
 49 and light-on (colored) trials from all perturbation sessions in all experimental mice. Results are shown for  
 50 bilateral (left) and unilateral (right) perturbations. Error bars: 95% CI. (e) Regression of animal choices  
 51 on evidence quantity throughout the cue period for light-off (black) and light-on (colored) trials. Weights  
 52 indicate the extent to which evidence was used to guide decisions, and the sum of weights is proportional  
 53 to overall performance. \*:  $p<0.01$  (99% CI, light-off: 0.18–0.21, 0.18–0.21, 0.21–0.25; bilateral:  
 54 0.01–0.15, -0.03–0.11, -0.02–0.13; left: -0.02–0.13, 0.02–0.16, -0.04–0.11; right: 0–0.14, -0.05–0.08,  
 55 0.05–0.2)

56 To determine whether cerebellar activity can modulate the evidence accumulation process, we  
57 used time-resolved, cell-type-specific optogenetic perturbation specifically during the cue period, when  
58 evidence is presented and prior to the decision. We stimulated ChR2-expressing PCs (Supplementary Fig.  
59 2), which inhibit the cerebellar output nuclei, using light delivered through optical fibers implanted  
60 bilaterally over crus I of the cerebellum. Light was delivered for the full duration of the cue period, either  
61 bilaterally or unilaterally in a randomly selected subset (15-30%) of trials over hundreds of behavioral  
62 sessions in 8 ChR2-expressing mice. Both unilateral and bilateral cerebellar perturbations led to  
63 reductions in performance (Fig. 1c-e), and unilateral perturbation induced a small ipsilateral choice bias  
64 on average (Fig. 1d). Impaired performance was associated with downweighting of evidence throughout  
65 the cue period (Fig. 1e). As a negative control, light delivery did not alter performance in ChR2<sup>-</sup> mice  
66 (Fig. 1c, No-opsin; Supplementary Fig. 3).

67 In this experiment, the decision lick occurred approximately 1 second ( $1.31 \pm 0.29$  s, mean  $\pm$  s.d.)  
68 after the end of light delivery, suggesting that the impairment did not arise from a deficit in the ability to  
69 lick. We nevertheless considered that light delivery might introduce a delayed effect that interfered with  
70 motor readout. Three measurements suggest otherwise. First, the fraction of trials in which animals made  
71 a response (in either direction) was unaffected by the perturbation ( $98.6 \pm 1.8\%$  mean  $\pm$  s.d. in light-on  
72 trials vs  $99.7 \pm 0.3\%$  in light-off trials;  $p=0.11$ , two-tailed paired t-test). Second, the latency from the end  
73 of the delay period to the decision lick was indistinguishable between light-on and light-off trials ( $578 \pm$   
74  $222$  ms mean  $\pm$  s.d. light-off vs  $595 \pm 332$  ms light-on;  $p=0.19$  bilateral,  $p=0.84$  left,  $p=0.14$  right,  
75 two-tailed paired t-test within subjects). Finally, light delivery did not influence the ability to make  
76 directed decision licks in trials where mice were cued which direction to lick with all-unilateral puffs  
77 during the cue period and delay (Fig. 1c, Guided non-memory; Supplementary Fig. 3). Therefore,  
78 cerebellar disruption during the cue period affected not the ability to lick but rather one or more aspects of  
79 the preceding process.

80           The observed impairment could be explained by a variety of mechanisms, including alteration of  
81 the weight of incoming stimuli (i.e. sensory gating or attention), impairment of the retention of past  
82 stimulus information, or interference with translation of accumulated information into directed motor  
83 actions<sup>16</sup> (Supplementary Fig. 4). We tested these alternatives by introducing additional trials in which  
84 light was delivered during a subsection of the cue period (Fig. 2). By regressing animal choice on  
85 evidence strength throughout the cue period (as in Fig. 1e), we quantified which specific cues animals  
86 remembered and incorporated into their choices, lending insight into the contents of their working  
87 memory when light was applied. Importantly, this approach differentiates scenarios that appear similar  
88 with simpler analyses, such as one in which light resets the animal's retention of accumulated evidence  
89 vs. one in which accumulation is intact but light prevents the animal from executing the desired lick  
90 (Supplementary Fig. 4).

91           Surprisingly, mice had no difficulty using the evidence presented concurrent with light delivery,  
92 but they did have difficulty retaining evidence that had been previously presented (Fig. 2a-c). In the most  
93 extreme case, light delivery in the final third caused mice to completely discount evidence from the first  
94 third of the cue period (Fig. 2a right panel, first weight 95% CI: -0.04–0.07). In other words, light  
95 delivery in the middle and final third did not cause uniform effects across all trials, but instead selectively  
96 altered behavior in those trials where evidence was strong near the *start* of the cue period, prior to light  
97 delivery. In additional separate trials with light delivery during the post-evidence delay period, mice  
98 downweighted evidence throughout the entire preceding cue period (Supplementary Fig. 5).

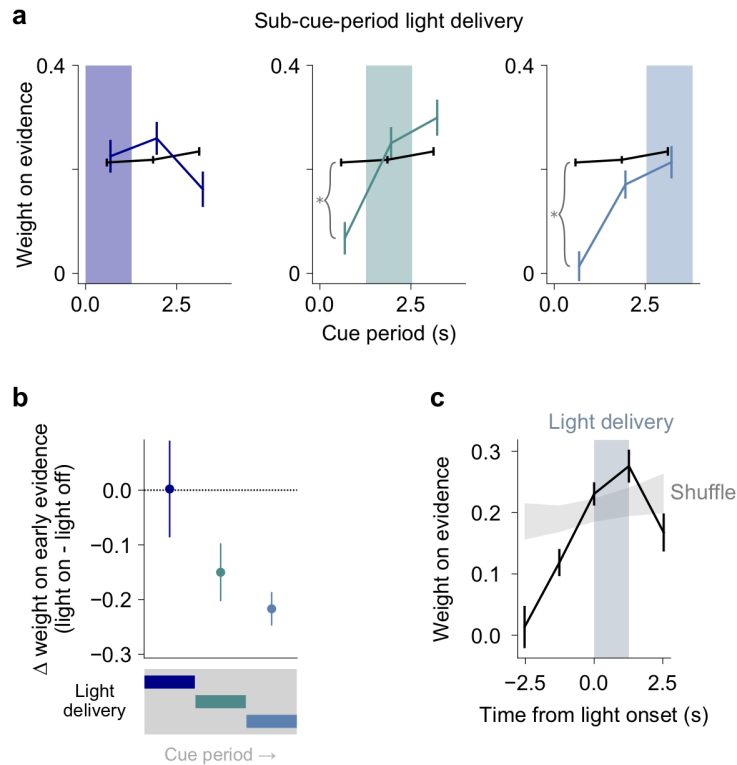

99 **Figure 2: Cerebellar disruption influences weighting of past evidence.** (a) Regression of animal  
100 choices on evidence quantity for light-off (black) and light-on (colored) trials (n=32,311 light-off trials,  
101 5669 light-on trials, 285 sessions, 8 mice). Weights indicate the extent to which evidence was used to  
102 guide decisions, and the sum of weights is proportional to overall performance. Colored shading indicates  
103 the time of light delivery. Error bars: s.e.m. of regression weights. \*: p<0.01 (99% CI on first bin,  
104 light-off: 0.19–0.23; light-on middle third: -0.01–0.15; light-on last third: -0.06–0.09). (b) Change in  
105 weight on evidence in the first third of cue period, as a function of when light was delivered during the  
106 cue period. Data points and error bars show mean ± s.e.m. across mice. (c) Evidence weight as a function  
107 of time relative to the onset of light delivery, with all cue-period light delivery conditions included (see  
108 Methods). Shuffle: light delivery time labels were shuffled before regression. Error bars: bootstrap s.d.

109 These results suggest that cerebellar perturbation influenced behavior by altering how mice  
110 integrate and retain evidence information over time. We further tested this hypothesis by fitting our data  
111 to an established drift-diffusion framework that explicitly models the incremental integration of pulses of  
112 evidence to form decisions<sup>18</sup>. Crucially, this model differentiates impairments in evidence integration and  
113 storage per se (e.g. leakiness of evidence from memory) from non-specific impairments such as decision

114 lapses that occur when animals fail to translate accumulated information into the proper action  
 115 (Supplementary Movie 1, Supplementary Fig. 6). The model achieves specificity by taking advantage of  
 116 the broad statistical distribution of stimulus timings available from thousands of trials.

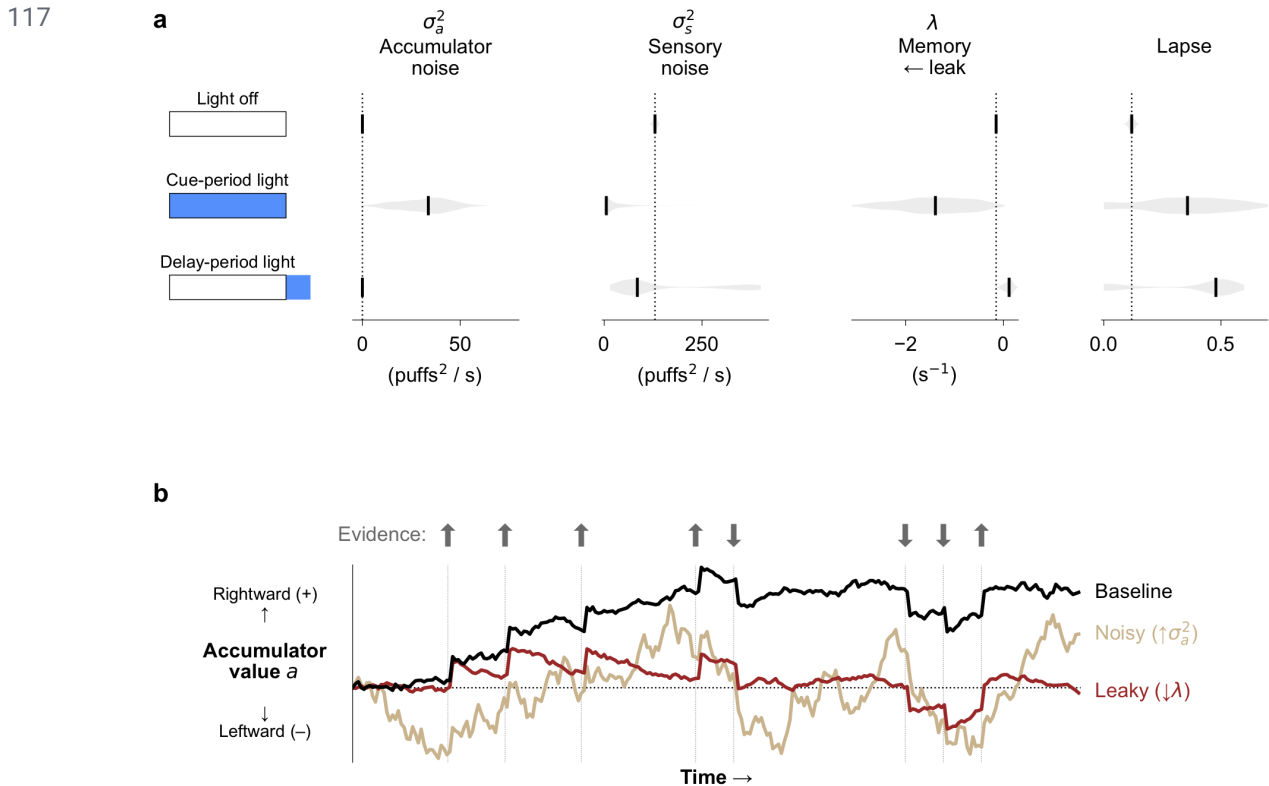

118 **Figure 3: Fits to a drift-diffusion model reveal specific deficits in evidence accumulation.** (a) Best-fit  
 119 drift diffusion model parameters in different light delivery conditions (schematics on left indicate light  
 120 delivery condition, with the box denoting the cue period and blue shading denoting light delivery). Fits  
 121 were computed multiple times for each condition using random subsets of the data to assess the reliability  
 122 of the best-fit parameters (see Methods). Black vertical ticks indicate the median best-fit parameter across  
 123 fit repetitions. Gray shading represents the distribution of fit parameters across repetitions. Vertical dotted  
 124 lines denote best-fit values in the light-off condition. (b) Visualization of the drift-diffusion model. The  
 125 model's accumulator value  $a$  is shown as it evolves over time in a single behavioral trial. Colored lines  
 126 demonstrate how the trajectory of  $a$  is qualitatively altered by changes in specific parameters. Arrows and  
 associated vertical lines indicate pulses of evidence. See also Supplementary Movie 1.

127 Our model estimated parameters quantifying accumulator noise ( $\sigma_a$ ), sensory noise ( $\sigma_s$ ),  
128 memory leak or instability ( $\lambda$ ), left-right bias, and a lapse rate. We fit all trials pooled across mice for the  
129 baseline light-off condition (n=56,550 trials), full-cue-period light delivery (n=6,394 trials), and  
130 delay-period light delivery (n=2,369 trials). Fits to light-off trials (Fig. 3a, top row, Supplementary Table  
131 1) demonstrate that at baseline mice performed evidence accumulation using strategies similar to humans  
132 and rats<sup>18</sup>, with small values for accumulator diffusion noise and lapse rate, and with leaky accumulation  
133 ( $<0$ ) consistent with the regression analysis (Supplementary Fig. 1b). When light was delivered for the  
134 full cue period (Fig. 3a, second row, Supplementary Table 1), behavior was characterized by an increase  
135 in  $\sigma_a^2$ , the diffusion noise in the accumulation process, and a decrease in  $\lambda$ , indicative of leakiness in  
136 evidence integration. Strikingly, the decay time constant  $\tau (=1/\lambda)$  of accumulated evidence in working  
137 memory decreased approximately tenfold, from 6.7 s in the baseline condition to 0.72 s with light  
138 delivery. Therefore, cerebellar disruption impaired the noise and stability of accumulated working  
139 memory contents (Fig. 3b, Supplementary Movie 1). In contrast, when cerebellar activity was perturbed  
140 during the delay (Fig. 3a, bottom row, Supplementary Table 1), performance deficits were likely best  
141 explained by an increase lapse rate, consistent with disruptions to accumulated information or to  
142 translation of that information into actions.

143 These results are consistent with clinical memory impairments observed after cerebellar  
144 lesions<sup>11,12</sup>, cerebellar roles in sensorimotor integration<sup>15,19</sup>, and theories of cerebellar function in working  
145 memory<sup>20</sup>. The results also align with recently reported cerebellar roles in motor preparation<sup>16,21</sup>, but add  
146 to those findings by extending cerebellar influence to the domain of evidence storage and manipulation  
147 for decision formation. The behavioral effects we characterized here were not observed with perturbations  
148 of other brain regions in similar paradigms<sup>3-5,7</sup>.



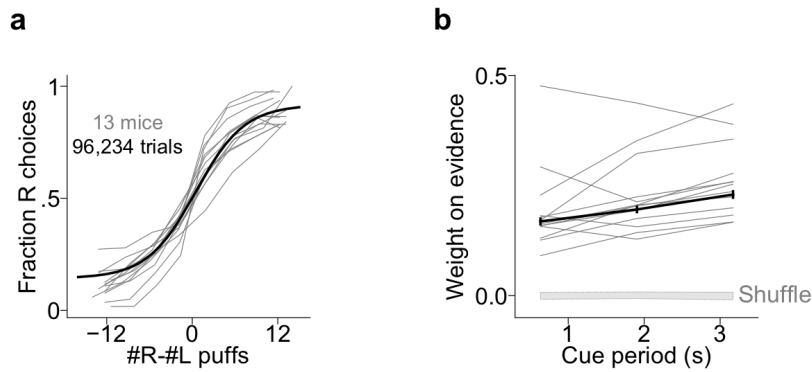

149 **Supplementary Figure 1: Performance in the somatosensory evidence accumulation task. (a)**

150 Psychometric curves for all individual mice (gray lines) and psychometric fit to the meta-mouse (black)  
151 consisting of all trials from all mice (n=96,254 trials over 664 sessions in 13 mice). Error bars: 95% CI.

152 (b) Regression analysis demonstrating the extent to which mice use evidence throughout the cue period to  
153 guide decisions. Weights indicate the extent to which evidence was used to guide decisions, and the sum  
154 of weights is proportional to overall performance. Upward slope indicates a slight tendency to weight  
155 later evidence more heavily than earlier evidence (error bars show 95% CI), which would be predicted by  
156 leaky integration of stimuli. Gray lines: individual mice. Black line: meta-mouse. Bottom gray shading:  
157 95% CI when choice was shuffled across trials.

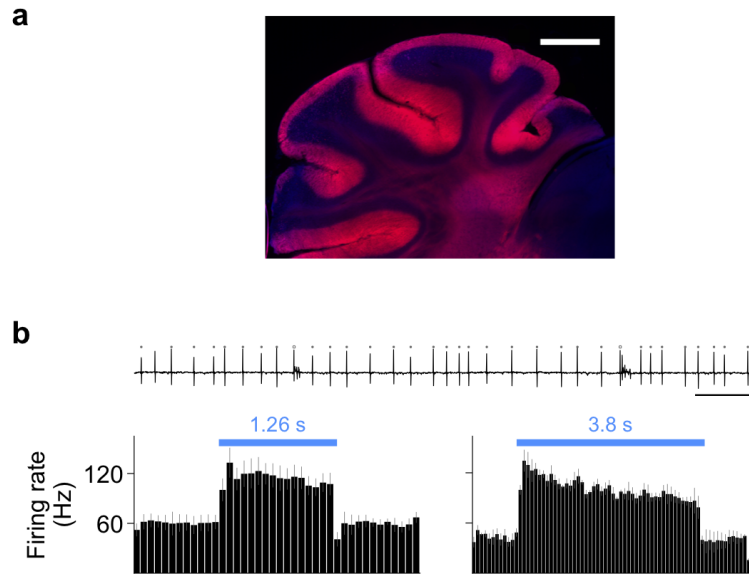

158 **Supplementary Figure 2: Optogenetic manipulation of cerebellar Purkinje cells.** (a) ChR2 expression  
159 in cerebellar Purkinje cells. Scale bar: 0.5 mm. Blue: DAPI, red: tdTomato fused to ChR2. (b) Top:  
160 extracellular electrical recording from an example Purkinje cell. Circles: simple spikes (filled) and  
161 complex spikes (open). Scale bar: 50 ms. Bottom: simple spike firing rate in response to light delivery  
162 (blue bars) of different durations. Bars show mean  $\pm$  s.e.m. of firing rate (n=10 cells, 3 mice). Bin width:  
163 80 ms.

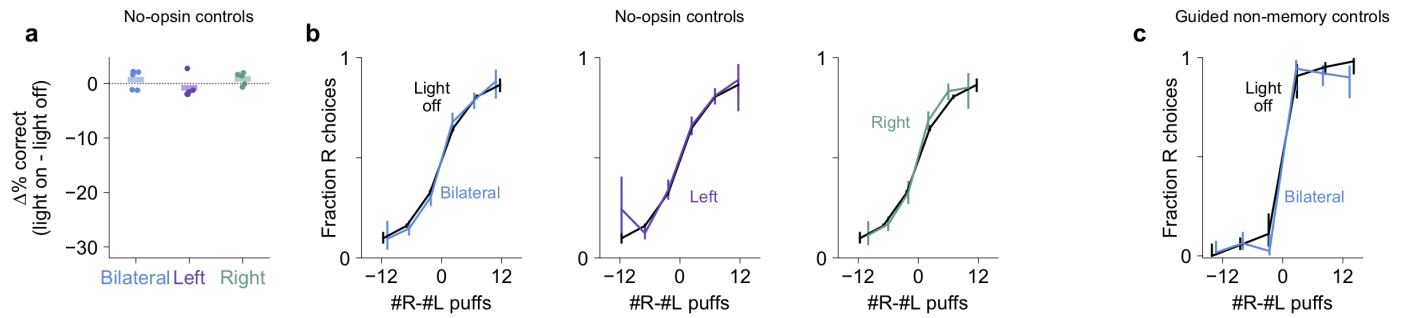

164 **Supplementary Figure 3: Light delivery has no behavioral effect in  $\text{ChR2}^-$  mice or in non-memory**  
165 **control trials.** (a) Change in performance with cue-period light delivery, as in Fig. 1c, for no-opsin  
166 control mice (n=15,281 light-off trials, 3,883 light-on trials, 118 sessions, 5 mice). Dots: individual mice.  
167 Horizontal lines: mean across mice. Data are not significantly different from zero; left to right: p=0.42,  
168 0.42, 0.17 (two-tailed paired t-tests). Error bars: 95% CI. (b) Psychometric curves as in Fig. 1d for control  
169 mice. Error bars: 95% CI. (c) Psychometric curves for experimental mice in trials requiring no memory,  
170 where mice were guided to lick the correct side by delivery of all single-sided puffs during the cue period  
171 and delay (n=558 light-off trials, 397 bilateral light-on trials, 8 mice). Error bars: 95% CI.

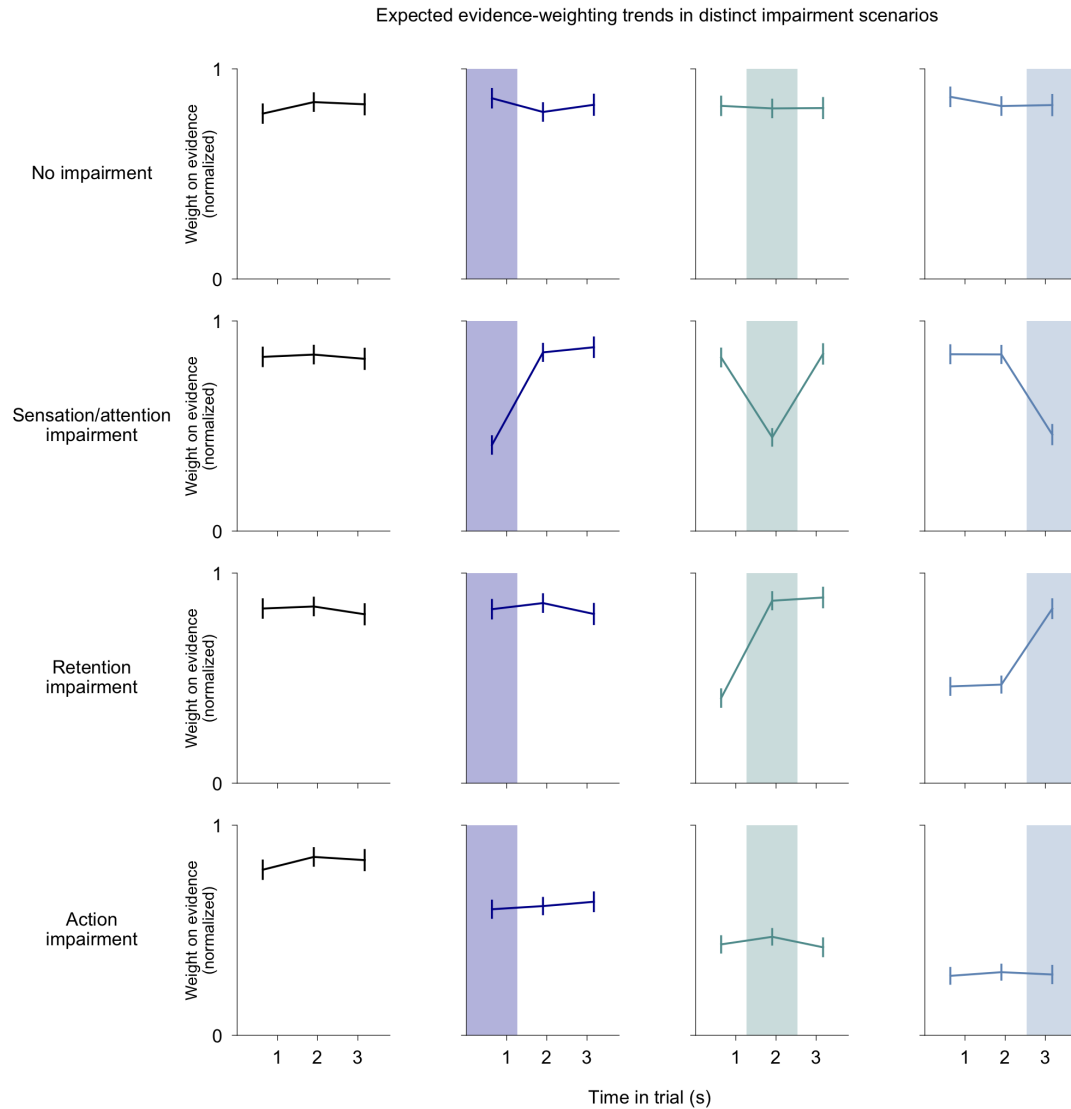

172 **Supplementary Figure 4: Demonstration of how regression analysis can differentiate distinct**  
173 **perturbation effects.** Simulations of different types of perturbations were performed. Trials and  
174 associated animal decisions were drawn from the baseline no-perturbation behavioral dataset. Then  
175 animal decisions were “perturbed” according to particular rules for four example scenarios (see Methods),  
176 presented in the four rows respectively. Each row shows four trial types from left to right, corresponding  
177 to light delivery conditions indicated by shading as in Fig. 2 (leftmost column: light off). First row:  
178 scenario where light delivery causes no impairment. Second row: scenario where light delivery impairs  
179 animals’ ability to sense, encode, or attend to stimuli delivered *concurrently* with the light. Third row:  
180 scenario where light delivery impairs the retention of previously accumulated information. Fourth row:  
181 scenario where evidence accumulation is intact but light delivery causes a failure to translate the  
182 accumulated information into an action, with increasing probability as the decision approaches. All  
183 regressions were performed and presented as in Fig. 2a. Regression weights indicate the extent to which  
184 evidence was used to guide decisions, and overall performance in any given scenario is proportional to  
185 the sum of weights. Error bars: 95% CI.

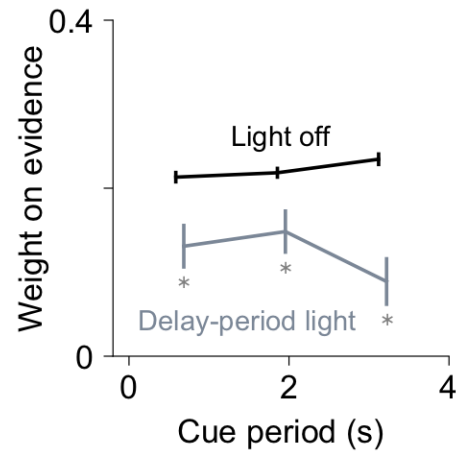

186 **Supplementary Figure 5: Delay period perturbation.** Regression analysis as in Fig. 1e for all light-off  
187 (black) and light-on (gray) trials (n=28,959 light-off trials, 2,060 light-on trials, 256 sessions, 8 mice).  
188 Weights indicate the extent to which evidence was used to guide decisions, and the sum of weights is  
189 proportional to overall performance. \*: p<0.05 (95% CI, light-off: 0.2–0.23, 0.2–0.23, 0.22–0.25;  
190 light-on: 0.08–0.18, 0.1–0.2, 0.03–0.15).

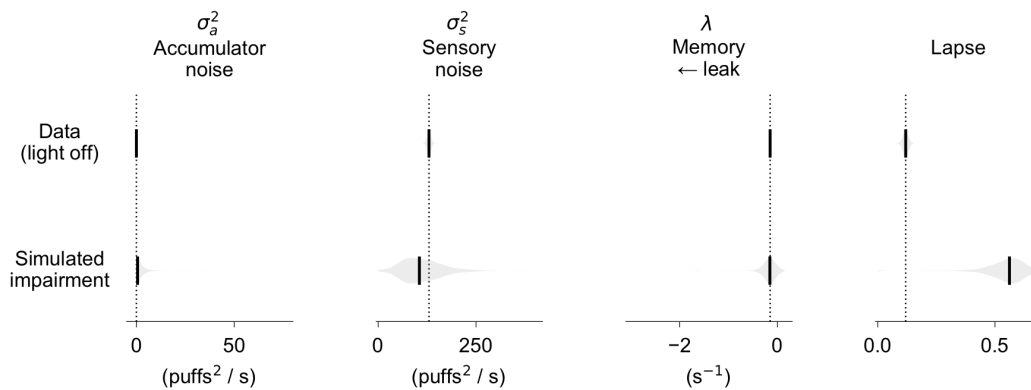

191 **Supplementary Figure 6: Simulated lapses demonstrate the specificity of model parameters.**

192 Subsamples of trials were randomly sampled from the baseline no-perturbation behavioral dataset, and a

193 specific decision impairment was simulated: in a scenario where stimulus accumulation in working

194 memory is intact but animals stochastically fail to translate this information into a directed action, one

195 would observe a random subset of trials in which decisions are opposite of the accumulated information

196 in memory. We therefore simulated the impairment by imposing a random choice on a random subset of

197 trials in these sampled datasets. These trials were then fit to the model in the same manner as the real data

198 (see Methods for additional details). As expected, the model captured the impairment as an increase in

199 lapse rate with no effect on other parameters. This exemplifies the power of the model to identify specific

200 deficits, confirming that the alterations in other parameters with cerebellar perturbation (Fig. 3) are not

201 explained by lapses in animals' ability to report the information accumulated in working memory. Display

202 conventions are the same as those in Fig. 3.

203 **Supplementary Movie 1:** Visual demonstration of the drift diffusion model parameters affected by  
204 cerebellar perturbation. Four consecutive scenarios are shown, all displaying the same behavioral trial (5  
205 left puffs, 3 right puffs; the correct choice is left). All four scenarios display the model's accumulator  
206 value  $a$  (i.e. working memory trace of stimulus information) over time as the stimuli are presented. The  
207 moving circle and white line display the evolving value of  $a$ . The color of the circle at any given moment  
208 indicates the sign of the accumulator and thus the side the agent would select if the decision occurred at  
209 that moment (in the absence of lapses). The arrows indicate puff (evidence) events, and the choice is  
210 indicated at the end of the trial by the flashing box. In each scenario, the meaning of one specific  
211 parameter is demonstrated.

212

**Supplementary Table 1: Best-fit drift diffusion model parameters (95% CI)**

|                          | $\sigma_a^2$<br>(puffs <sup>2</sup> / s) | $\sigma_s^2$<br>(puffs <sup>2</sup> / s) | $\lambda$<br>(s <sup>-1</sup> ) | bias                     | lapse                 |
|--------------------------|------------------------------------------|------------------------------------------|---------------------------------|--------------------------|-----------------------|
| Light off                | 0.01<br>(0.00 – 0.08)                    | 129.84<br>(120.62 – 139.08)              | -0.15<br>(-0.17 – -0.13)        | -0.43<br>(-0.46 – -0.39) | 0.12<br>(0.10 – 0.14) |
| Full cue<br>period light | 33.67<br>(6.72 – 53.63)                  | 5.54<br>(0.03 – 150.07)                  | -1.39<br>(-2.77 – -0.24)        | 0.48<br>(0.23 – 1.10)    | 0.36<br>(0.00 – 0.66) |
| Delay period<br>light    | 0.00<br>(0.00 – 1.48)                    | 84.75<br>(37.30 – 397.57)                | 0.11<br>(-0.09 – 0.24)          | 1.93<br>(1.37 – 2.55)    | 0.48<br>(0.00 – 0.56) |



213 **Acknowledgements**

214 We thank the members of the laboratories of S.W., D.W.T., Ilana Witten, Carlos Brody, and the BRAIN  
215 COGS group for discussion and technical assistance, Marlies Oostland for animal training and  
216 discussions, Henk-Jan Boele for comments on the manuscript, and Julia Kuhl for illustration. Funded by  
217 National Institutes of Health grants F30 MH115577, U19 NS104648, R01 MH115750, R01 NS045193.

218 **Author contributions**

219 B.D. performed experiments and analyzed data. M.K. performed histology and electrophysiology  
220 experiments. B.D. wrote the manuscript with contributions from all authors. B.D., S.W., and D.W.T.  
221 conceived the project.

222 **Data availability**

223 The datasets generated and analyzed in the current study are available from the corresponding author  
224 upon request.

225 **Code availability**

226 All experimental and analysis code is available at the links provided in the Methods section.

227 **Methods**

228 **Mice:** Experimental procedures were approved by the Princeton University Institutional Animal Care and  
229 Use Committee and performed in accordance with the animal welfare guidelines of the National Institutes  
230 of Health. Data for the behavioral task came from 13 mice (5 female, 8 male, 8-25 weeks of age during  
231 experiments) of genotypes *Pcp2-Cre* for Purkinje-cell specificity and *Ai27D* for channelrhodopsin-2 (8  
232 animals *Pcp2-Cre* x *Ai27D*, 5 animals *Ai27D*) acquired from The Jackson Laboratory, Stock #010536  
233 (RRID:IMSR\_JAX:010536) and #012567 (RRID:IMSR\_JAX:012567), respectively. Experimenters were  
234 blinded to the genotypes of the mice for the duration of the experiments. Data for electrophysiology  
235 experiments came from an additional 3 mice of genotype *Pcp2-Cre* x *Ai27D*. Mice were housed in a  
236 12-hour:12-hour reverse light:dark cycle facility, and experiments were performed during the dark cycle.  
237 During the experimental day, mice were housed in darkness in an enrichment box containing bedding,  
238 houses, wheels (Bio-Serv Fast-Trac K3250/K3251), climbing chains, and play tubes. At other times, mice  
239 were housed in cages in the animal facility in groups of 2-4 mice per cage. Mice received 1.0-1.5 mL of  
240 water per day. Body weight and condition was monitored daily.

241 **Surgical procedures:** Mice were anesthetized with isoflurane (5% for induction, 1.0–2.5% for  
242 maintenance) and underwent surgical procedures lasting 2-4 hours. Two ~500- $\mu$ m diameter craniotomies  
243 were drilled over the cerebellum, one over each hemisphere, directly posterior to the lamboid suture and  
244 approximately 3.6 mm lateral to the midline in either direction. Ferrule implants were constructed as in<sup>22</sup>  
245 with 400- $\mu$ m-diameter optical fiber (Thorlabs FT400EMT) glued to 1.25-mm OD stainless steel ferrules  
246 (Precision Fiber Products MM-FER2007-304-4500) using epoxy (Precision Fiber Products PFP 353ND).  
247 Ferrules were positioned over each craniotomy with the fiber tip at the surface of the dura mater, and  
248 Vetbond (3M) was applied surrounding the exposed fiber. Dental cement (C&B Metabond, Parkell Inc.),

249 darkened by mixing with India ink (Koh-I-Noor #3080-4), was then applied to secure the ferrule to the  
250 skull. In some mice, separate implants were placed over neocortex for other experiments. When animals  
251 were not engaged in experiments, optical implants were protected using ceramic ferrule sleeves (Precision  
252 Fiber Products SM-CS, 1.25-mm ID, 6.6-mm length). Implants were cleaned before each behavior session  
253 using a fiber optic cleaning kit (Thorlabs CKF). A custom-machined titanium headplate<sup>23</sup> was cemented  
254 to the skull using dental cement (C&B Metabond, Parkell Inc.). All animals were given buprenorphine  
255 (0.1 mg/kg body weight) and rimadyl (5 mg/kg body weight) after surgery and were given at least 5 days  
256 of recovery in their home cages before the start of experiments.

257 **Behavior:** Mice were trained to perform a previously described evidence-accumulation decision-making  
258 task<sup>17</sup>. Briefly, head-fixed mice were seated in tube for 1-hour behavioral sessions consisting of 200-300  
259 trials. In each trial, independent streams of randomly timed 40-ms air puffs (2.5 Hz, minimum 200 ms  
260 interpuff interval) were delivered to the left and right sides over the course of a 3.8-second or 1.5-second  
261 cue period (duration chosen randomly with 0.85 and 0.15 probability, respectively). After a delay of 800  
262 ms (or in ~10% of early sessions, 200 ms), lick ports were advanced into the reach of the animal, and  
263 animals licked to the side with the greater number of puffs to retrieve a water reward. The animal's  
264 decision was interpreted as the side licked first, regardless of subsequent licks. Guided non-memory trials  
265 had the same structure except puffs were delivered only on a single side throughout the cue period, and  
266 regular 2.5 Hz guide puffs were delivered during the delay; choice was again defined as the side of the  
267 first lick (and in guided trials a reward was delivered in all cases independent of choice). The behavioral  
268 apparatus were controlled by custom-written Python software  
269 ([https://github.com/wanglabprinceton/accumulating\\_puffs](https://github.com/wanglabprinceton/accumulating_puffs)).

270 **Optogenetics:** Light for optogenetic stimulation was produced by two 470-nm LEDs (Thorlabs M470F3,  
271 one for each implant) each powered by an LED driver (Thorlabs LEDD1B). Fiber optic patch cables  
272 (Thorlabs M98L01) carried light from the LEDs to the ferrule implants, where they were connected via  
273 custom-machined black delrin sleeves. Light was delivered through 400- $\mu$ m-diameter optical fibers in  
274 5-ms pulses at 50 Hz (generated by Master-8), with an intensity of 3-15 mW/mm<sup>2</sup>. Based on published  
275 results<sup>24-27</sup>, we estimate that the light emitted from each fiber illuminated a roughly spherical region of  
276 tissue <1 mm in diameter, corresponding to a large fraction of cerebellar crus I. Light delivery was  
277 triggered via electrical signals sent by the behavioral control software through a DAQ card (National  
278 Instruments, NI PCI-MIO-16E-4). Cue period light was delivered over the entire cue period through the  
279 left, right, or both implants. Sub-cue-period light was delivered bilaterally to both implants for one third  
280 of the cue period, and delay period light was delivered bilaterally to both implants for the entire 800-ms  
281 delay period or for the first 200 or 500 ms. Light delivery trials were interleaved with light-off trials and  
282 were selected randomly with a uniform probability (ranging from 15-30%) throughout the session. All  
283 analyses compare light-off and light-on trials only from behavioral sessions in which light was delivered.

284 **Electrophysiology:** Single-unit recordings in 3 awake *Pcp2-Cre-Ai27D* mice were performed using  
285 borosilicate glass electrodes (1B100F-4, World Precision Instruments) with 1- to 2- $\mu$ m tips and 3 to 12  
286 M $\Omega$  impedance, fabricated on a pipette puller (P-2000, Sutter Instruments Co.) and filled with sterile  
287 saline. Electrical signals were amplified with a CV-7B headstage and Multiclamp 700B amplifier,  
288 digitized at 10 KHz with a Digidata 1440A and acquired in pClamp (Axon Instruments, Molecular  
289 Devices) in parallel with TTL pulses from a signal generator (Master-8, A.M.P.I.), which was used to  
290 synchronize recording and optical stimulation. Light was delivered through a ferrule implant identical to  
291 those used in behavior experiments, positioned above an open craniotomy and connected to a  
292 fiber-coupled LED (M470F3, Thorlabs) with a TTL-controlled driver (LEDD1B, Thorlabs). The fiber

293 optic was always moved independently of the recording electrode using a second motorized  
294 micromanipulator (MP-225; Sutter Instrument Co.). The optical stimulation parameters were the same as  
295 those used in the behavioral experiments. Spike detection was performed using custom code written in  
296 MATLAB 2017b.

297 **Histology:** Animals were deeply anesthetized and then transcardially perfused using a peristaltic pump  
298 with phosphate buffered saline (PBS) followed by chilled 10% formalin (Fisher Scientific). Brains were  
299 extracted from the skull after perfusion, postfixed overnight at 4°C, cryoprotected in 30% sucrose in PBS,  
300 embedded in O.C.T. compound 4585 (Tissue-Plus, Fisher HealthCare) and stored at -80°C until  
301 sectioning. 50- $\mu$ m-thick sagittal sections were cut with a Leica CM3050 S cryostat. To remove the  
302 cryoprotective solution, sections were washed with PBS. Sections were mounted on slides and covered  
303 with Fluoroshield anti-fade reagent with DAPI (Sigma). Images were acquired on an inverted fluorescent  
304 microscope (Nikon Eclipse Ti) using NIS-Elements AR software. Image processing was performed in  
305 Python.

#### 306 **Data Analysis:**

307 *Software.* Data analyses and figure creation were performed using custom code written for Python 3.6  
308 (code available at <https://github.com/bensondaled/puffsopto>), which makes use of Numpy 1.14.3<sup>28</sup>, Scipy  
309 1.0.0<sup>29</sup>, Pandas 0.23.4<sup>30</sup>, Matplotlib 2.2.2<sup>31</sup>, IPython 6.1.0<sup>32</sup>, Scikit-learn 0.19.1<sup>33</sup>, and Statsmodels 0.9.0<sup>34</sup>.

310 *Performance and psychometrics.* Data for performance and psychometric measures were obtained only  
311 from trials in the final stages of the task, and not from the preceding stages during the shaping procedure.  
312 Performance, psychometric, and regression analyses contain only trials in which mice made decision  
313 licks, such that incorrect trials correspond to licks in the wrong direction, and never the absence of a

314 decision lick. Optogenetic analyses compare light-off and light-on trials only from sessions in which  
315 light-on trials were delivered and only from trials with the primary 3.8-second cue period. Confidence  
316 intervals on fractions of correct or left/right-choice trials were computed by the Jeffreys method for  
317 binomial confidence intervals. The meta-mouse psychometric curve in Supplementary Fig. 1a consists of  
318 pooled trials from all mice and was fit to a four-parameter logistic function of the form:

319

$$y(x) = y_0 + \frac{A}{1 + e^{\frac{-(x-x_0)}{b}}}$$

320 *Behavior regression analysis.* To determine the dependence of animal choice on stimuli in different  
321 temporal bins of the cue period, we performed a regression-based analysis. Data for regression analysis  
322 consisted of trials with a cue period duration of 3.8 seconds. Logistic regressions were performed with  
323 animal decision on a trial-by-trial basis as the predicted variable. The input for each trial was a vector of  
324 values corresponding to the difference in right vs left puffs in temporally uniform bins of the cue period.  
325 Logistic regression models were fit with no intercept term and no regularization. Confidence intervals on  
326 regression weights were computed using the standard error of the parameter fits and the standard normal  
327 distribution. The light-delivery-aligned regression in Fig. 2c was computed by performing the regression  
328 analysis on each perturbation condition separately, then averaging weights across conditions aligned to  
329 light onset, wherever these weights existed. For example, the weight following light offset is the mean  
330 regression weight at that time point from the first- and middle-third light delivery conditions. Error bars  
331 were computed using a bootstrap approach: for each regression fit, a random sample of trials was selected  
332 with replacement from the set of trials to be fit, and the analysis was run on these trials. This procedure  
333 was repeated 100 times and error bars were computed as the standard deviation of the resulting weights  
334 across runs.

335 *Simulations for regression analyses.* For all simulations in Supplementary Fig. 4, we used the full baseline  
336 dataset of 48,239 non-manipulation trials delivered to animals during real experiments. In light-off and

337 no-impairment simulations (left column and top row in Supplementary Fig. 4), simulated decisions were  
338 sampled trial-by-trial from the empirical psychometric curve exhibited by the trained animals. For light  
339 delivery conditions (remainder of panels), the decisions were also simulated in this way, but with the  
340 addition of simulated perturbation-like interventions, as follows: (1) in the “sensation/attention  
341 impairment” scenario, for each trial, stimuli *coinciding* with light delivery were given half the magnitude  
342 of all other stimuli, then the cumulative evidence was summed for the trial yielding a new effective total  
343 #R–#L value, from which a decision was drawn using the empirical psychometric curve like above. (2) in  
344 the “retention impairment” scenario, for each trial, stimuli *preceding* light delivery were given half the  
345 magnitude of all other stimuli, and the same procedure was applied. (3) in the “action impairment”  
346 scenario, for each trial, stimuli were summed (i.e. accumulated) normally and decisions were drawn as in  
347 the no-impairment condition, but then the decision was stochastically switched to the opposite side with a  
348 probability inversely proportional to the time until the decision lick, emulating a failure to execute the  
349 decision that matches the agent’s internal accumulated memory. Regressions were performed on each  
350 resulting simulation dataset in the same manner as the data figures.

351 *Drift diffusion modeling.* Our model is based on the one presented in <sup>18</sup>. In each trial, an accumulator  
352 value  $a(t)$  tracks the level of evidence presented in the trial so far, with right-sided stimuli corresponding  
353 to positive deflections and left-sided stimuli to negative deflections. When the trial ends, the choice is  
354 defined as the sign of  $a$ , positive for rightward choices and negative for leftward choices.  $\sigma_a^2$  is a diffusion  
355 constant that parameterizes noise in  $a$ .  $\sigma_s^2$  parameterizes noise associated with single left or right puffs.  $\lambda$   
356 parameterizes drift in the memory  $a$ . When  $\lambda < 0$ , the accumulator  $a$  drifts towards 0, causing earlier  
357 evidence to influence the decision less than later evidence, often called “leakiness.” When  $\lambda > 0$ , the  
358 accumulator  $a$  drifts further from 0, causing earlier puffs to influence the decision more than later puffs,  
359 often called “instability.” These features are implemented by the model:

360 
$$da = \sigma_a dW + (\delta_{t,t_R} \cdot \eta_R - \delta_{t,t_L} \cdot \eta_L) dt + \lambda a dt$$

361 where  $\delta_{t,t_{R/L}}$  are delta functions at the puff events,  $\eta$  are i.i.d. Gaussian variables drawn from  $N(1, \sigma_s)$ , and  
362  $dW$  is a white-noise Weiner process. At time  $t=0$ , the value of  $a$  is set to 0. In addition, a bias  
363 parameterizes an offset in  $a$  and a lapse rate parameterizes the fraction of trials on which a random  
364 response is made. Ideal performance is characterized by an accumulator value  $a = \#R - \#L$  puffs, which  
365 would be achieved by setting the following parameter values:  $\lambda = 0$ ,  $\sigma_a^2 = 0$ ,  $\sigma_s^2 = 0$ , bias=0, lapse=0.  
366 Because data were pooled across subjects and bilateral perturbations, we did not interpret the best fit  
367 values of the bias parameter to be meaningful, but we included them so as not to capture incidental bias in  
368 other parameters like lapse rate. The model was fit using automatic differentiation as in <sup>7</sup>, and fits were  
369 including in analyses only if the resulting Hessian matrix of the model likelihood with respect to the  
370 model parameters was positive semidefinite. To estimate the confidence intervals of fit parameters, each  
371 model was fit 1000 times, initializing with random values for each parameter and omitting a random 20%  
372 of trials in each repetition. The median parameter values and confidence intervals were assessed across fit  
373 repetitions.

374 *Drift diffusion model simulation.* The demonstration in the second row of Supplementary Fig. 6 was  
375 produced as follows: Random subsamples (n=500 subsamples, 10,000 trials each) were collected from  
376 the behavioral dataset without perturbation (i.e. light-off). A simulated “perturbation” was then introduced  
377 by choosing a random 50% of trials and replacing the true animal choice with a random selection (either  
378 left or right). This reflects the concept of a lapse: i.e. an impairment in selecting the desired response, and  
379 specifically one that is not tied to the timing or quantity of accumulated evidence information. Each of the



380 500 subsamples of trials with the perturbation applied were then fit to the drift diffusion model using the  
381 same methods as the data fitting in Fig. 3.

382 The trials shown in Supplementary Movie 1 and Fig. 3b were generated as follows: a single trial  
383 with 5 left puffs and 3 right puffs was produced, and the accumulator value  $a$  throughout the trial was  
384 calculated by running the model (equation in the Drift Diffusion Modeling section above) in discrete time  
385 steps of 15 ms. For the Baseline case, parameters were chosen to be similar to the empirically fit light-off  
386 behavioral data (Supplementary Table 1). The leaky, noisy, and lapse conditions were simulated by  
387 altering those parameters and re-running the simulation. Playback was slowed for visualization purposes.

388 **References**

- 389 1. Gold, J. I. & Shadlen, M. N. The Neural Basis of Decision Making. *Annual Review of Neuroscience* **30**,  
390 535–574 (2007).
- 391 2. Brody, C. D. & Hanks, T. D. Neural underpinnings of the evidence accumulator. *Current Opinion in*  
392 *Neurobiology* (2016). doi:10.1016/j.conb.2016.01.003
- 393 3. Erlich, J. C., Brunton, B. W., Duan, C. A., Hanks, T. D. & Brody, C. D. Distinct effects of prefrontal  
394 and parietal cortex inactivations on an accumulation of evidence task in the rat. *Elife* **4**, (2015).
- 395 4. Hanks, T. D. *et al.* Distinct relationships of parietal and prefrontal cortices to evidence accumulation.  
396 *Nature* **520**, 220–223 (2015).
- 397 5. Pinto, L., Tank, D., Brody, C. & Thiberge, S. Widespread cortical involvement in evidence-based  
398 navigation. in *Cosyne Abstracts* (2018).
- 399 6. Odoemene, O., Pisupati, S., Nguyen, H. & Churchland, A. K. Visual evidence accumulation guides  
400 decision-making in unrestrained mice. *The Journal of Neuroscience* 3478–17 (2018).  
401 doi:10.1523/JNEUROSCI.3478-17.2018
- 402 7. Yartsev, M. M., Hanks, T. D., Yoon, A. M. & Brody, C. D. Causal contribution and dynamical encoding  
403 in the striatum during evidence accumulation. *eLife* **7**, (2018).
- 404 8. Prevosto, V., Graf, W. & Ugolini, G. Cerebellar Inputs to Intraparietal Cortex Areas LIP and MIP:  
405 Functional Frameworks for Adaptive Control of Eye Movements, Reaching, and Arm/Eye/Head  
406 Movement Coordination. *Cereb Cortex* **20**, 214–228 (2010).
- 407 9. Strick, P. L., Dum, R. P. & Fiez, J. A. Cerebellum and Nonmotor Function. *Annual Review of*  
408 *Neuroscience* **32**, 413–434 (2009).
- 409 10. Bostan, A. C. & Strick, P. L. The basal ganglia and the cerebellum: nodes in an integrated network.  
410 *Nature Reviews Neuroscience* **19**, 338–350 (2018).
- 411 11. Schmahmann, J. D. & Sherman, J. C. The cerebellar cognitive affective syndrome. *Brain* **121** (Pt 4),  
412 561–579 (1998).
- 413 12. Kansal, K. *et al.* Structural cerebellar correlates of cognitive and motor dysfunctions in cerebellar  
414 degeneration. *Brain* **140**, 707–720 (2017).
- 415 13. Ravizza, S. M. *et al.* Cerebellar damage produces selective deficits in verbal working memory. *Brain*  
416 **129**, 306–320 (2006).
- 417 14. Ferrari, C. *et al.* TMS Over the Cerebellum Interferes with Short-term Memory of Visual Sequences.  
418 *Sci Rep* **8**, 6722 (2018).
- 419 15. Proville, R. D. *et al.* Cerebellum involvement in cortical sensorimotor circuits for the control of  
420 voluntary movements. *Nature Neuroscience* **17**, 1233–1239 (2014).
- 421 16. Gao, Z. *et al.* A cortico-cerebellar loop for motor planning. *Nature* **563**, 113–116 (2018).
- 422 17. Deverett, B., Koay, S. A., Oostland, M. & Wang, S. S. Cerebellar involvement in an  
423 evidence-accumulation decision-making task. *eLife* **7**, e36781 (2018).
- 424 18. Brunton, B. W., Botvinick, M. M. & Brody, C. D. Rats and Humans Can Optimally Accumulate  
425 Evidence for Decision-Making. *Science* **340**, 95–98 (2013).
- 426 19. Ishikawa, T., Shimuta, M. & Häusser, M. Multimodal sensory integration in single cerebellar granule  
427 cells *in vivo*. *eLife* **4**, (2015).
- 428 20. Ito, M. Control of mental activities by internal models in the cerebellum. *Nat Rev Neurosci* **9**,  
429 304–313 (2008).
- 430 21. pierre Chabrol, F., Blot, A. & Mrsic-Flogel, T. D. Cerebellar contribution to preparatory activity in  
431 motor neocortex. *bioRxiv* 335703 (2018).

432 **References** (Methods section)

- 433 22. Sparta, D. R. *et al.* Construction of implantable optical fibers for long-term optogenetic manipulation  
434 of neural circuits. *Nature Protocols* **7**, 12–23 (2011).
- 435 23. Dombeck, D. A., Khabbaz, A. N., Collman, F., Adelman, T. L. & Tank, D. W. Imaging Large-Scale  
436 Neural Activity with Cellular Resolution in Awake, Mobile Mice. *Neuron* **56**, 43–57 (2007).
- 437 24. Nguyen-Vu, T. D. B. *et al.* Cerebellar Purkinje cell activity drives motor learning. *Nature*  
438 *Neuroscience* **16**, 1734–1736 (2013).
- 439 25. Tsubota, T., Ohashi, Y., Tamura, K., Sato, A. & Miyashita, Y. Optogenetic Manipulation of Cerebellar  
440 Purkinje Cell Activity In Vivo. *PLoS ONE* **6**, e22400 (2011).
- 441 26. Yizhar, O., Fenno, L. E., Davidson, T. J., Mogri, M. & Deisseroth, K. Optogenetics in Neural  
442 Systems. *Neuron* **71**, 9–34 (2011).
- 443 27. Kruse, W. *et al.* Optogenetic Modulation and Multi-Electrode Analysis of Cerebellar Networks In  
444 Vivo. *PLoS ONE* **9**, e105589 (2014).
- 445 28. Oliphant, T. A guide to NumPy. in (Trelgol Publishing, 2006).
- 446 29. Jones, E., Oliphant, T., Peterson, P. & others. *SciPy: Open source scientific tools for Python.* (2001).
- 447 30. McKinney, W. Data Structures for Statistical Computing in Python. in *Proceedings of the 9th Python*  
448 *in Science Conference* (eds. Walt, S. van der & Millman, J.) 51–56 (2010).
- 449 31. Hunter, J. D. Matplotlib: A 2D Graphics Environment. *Computing in Science & Engineering* **9**, 90–95  
450 (2007).
- 451 32. Perez, F. & Granger, B. E. IPython: A System for Interactive Scientific Computing. *Computing in*  
452 *Science & Engineering* **9**, 21–29 (2007).
- 453 33. Pedregosa, F. *et al.* Scikit-learn: Machine Learning in Python. *Journal of Machine Learning Research*  
454 **12**, 2825–2830 (2011).
- 455 34. Seabold, S. & Perktold, J. Statsmodels: Econometric and statistical modeling with python. in *9th*  
456 *Python in Science Conference* (2010).
